# Supplementary material for: SOX9 accelerates ESC differentiation to three germ layer lineages by repressing SOX2 expression through P21 (WAF1/CIP1)
Source: Oxford University Press journal article supplement (doi:10.1242/dev.115436), 2014-11-04
Supplement: dev115436supp.pdf [file dev115436supp.pdf]

Fig. S1 Yamamizu K.

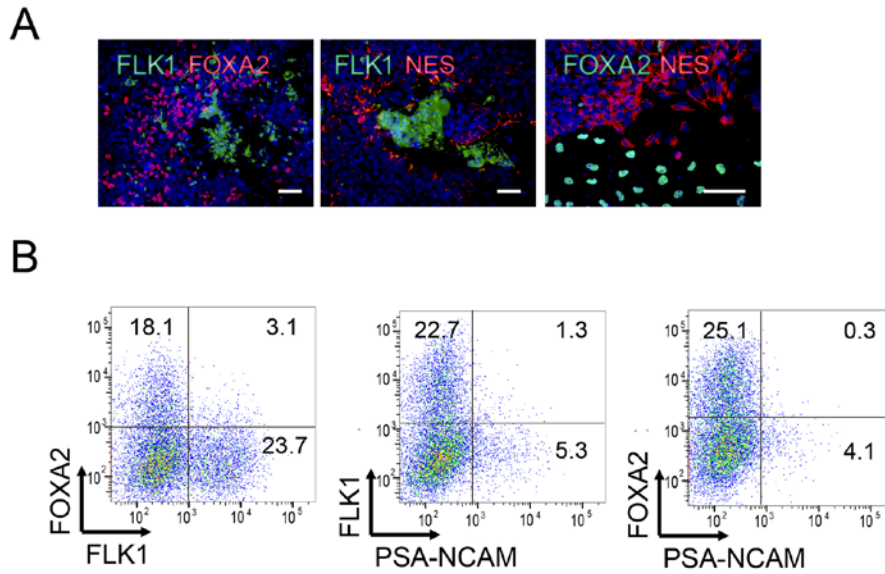

**Fig. S1. Markers of different germ layers did not colocalize in the same cells.** (A) Microscopic images of ESCs cultured for 5 days in the differentiation condition and stained with the combination of markers: FLK1 (mesoderm), FOXA2 (endoderm), or NES (ectoderm). Scale bar: 200  $\mu$ m. (B) Examples of FACS analyses: ESCs cultured for 5 days in the differentiation condition and stained for the combination of markers: FLK1<sup>+</sup> and FOXA2<sup>+</sup>, FLK1<sup>+</sup> and PSA-NCAM<sup>+</sup>, or FOXA2<sup>+</sup> and PSA-NCAM<sup>+</sup>.

Fig. S2 Yamamizu K.

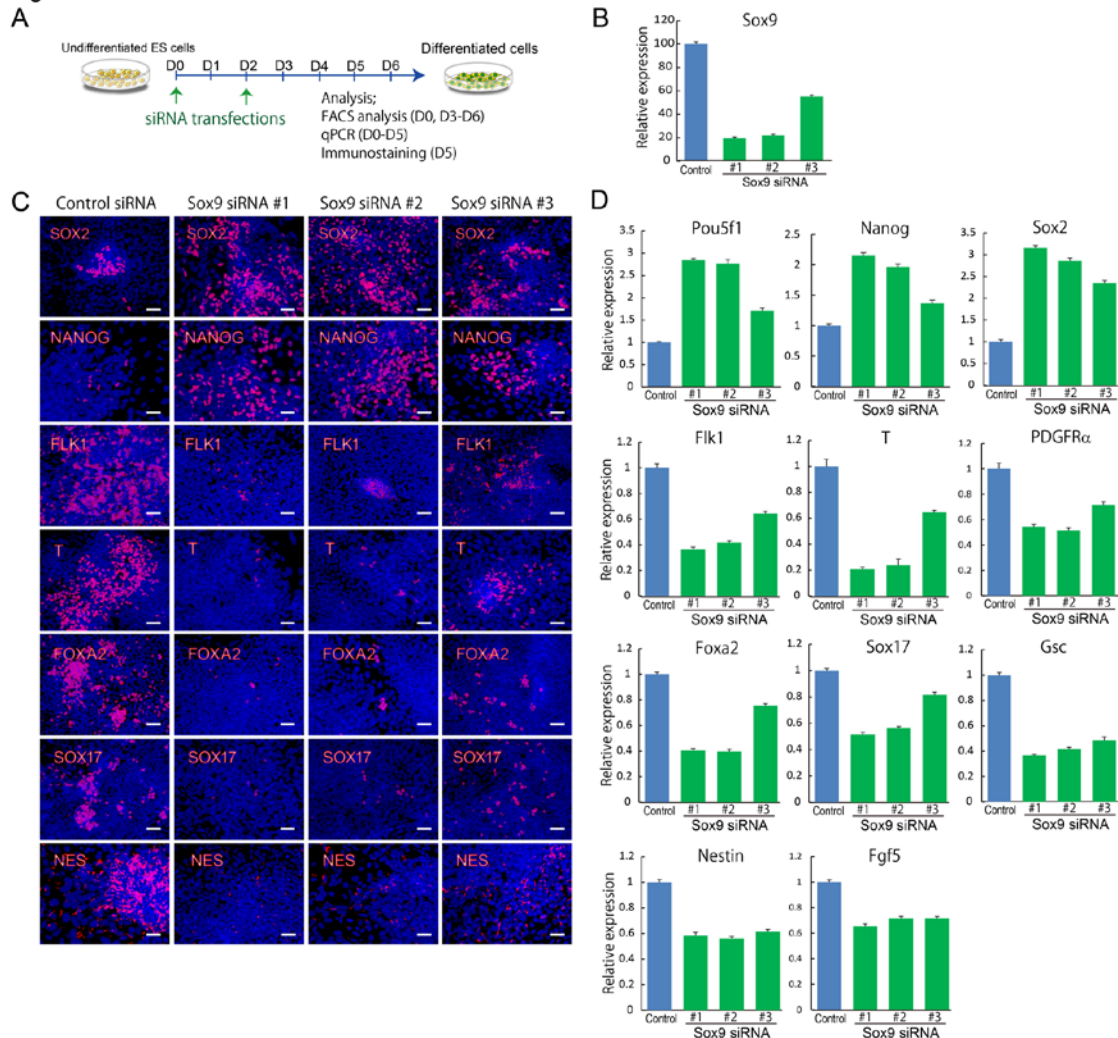

**Fig. S2. Blocking the activation of endogenous *Sox9* inhibits the differentiation of ESCs into three germ layers.** (A) Schematic diagram showing an experimental design. (B) qPCR analysis showing the mRNA expression of *Sox9* after treating cells with three independent siRNAs against *Sox9* or control. (C) Microscopy images of ESCs cultured for 5 days after treating with three independent siRNAs against *Sox9* or control and stained with pluripotency markers (SOX2, NANOG), mesoderm markers (FLK1, T), endoderm markers (FOXA2, SOX17) and an ectoderm marker (NES). Scale bar: 200  $\mu$ m. (D) qPCR analyses showing the mRNA expression of pluripotency markers (*Pou5f1*, *Nanog*, *Sox2*), mesoderm markers (*Flk1*, *T*, *PDGFR $\alpha$* ), endoderm markers (*Foxa2*, *Sox17*, *Gsc*) and ectoderm markers (*Nestin*, *Fgf5*) in ESCs cultured for 5 days after treating three independent siRNAs against *Sox9* or control.

Fig. S3 Yamamizu K.

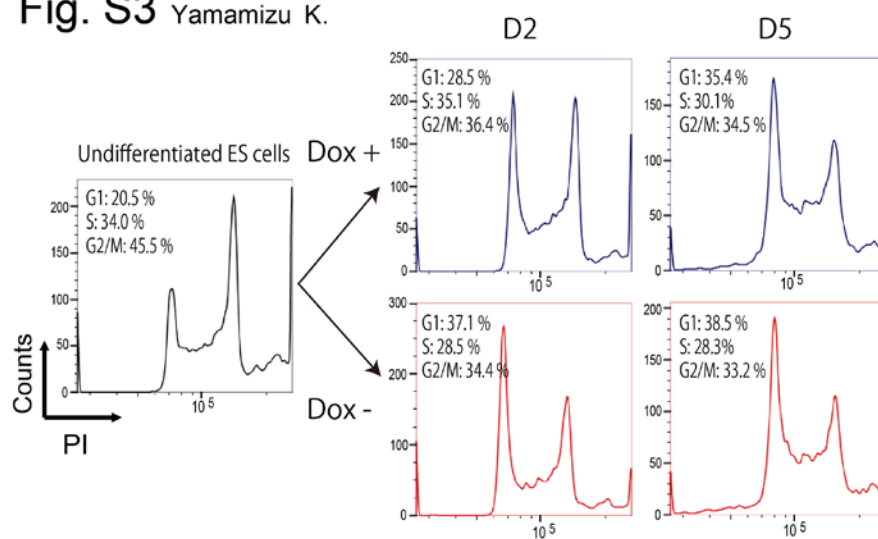

**Fig. S3. Cell cycle profiles of Sox9-inducible ESCs by FACS analysis.** FACS analysis showing cell cycle profiles of Sox9-inducible ESCs cultured for 2 days (D2) or 5 days (D5) in the Dox+ (control) or Dox- condition.

Fig. S4 Yamamizu K.

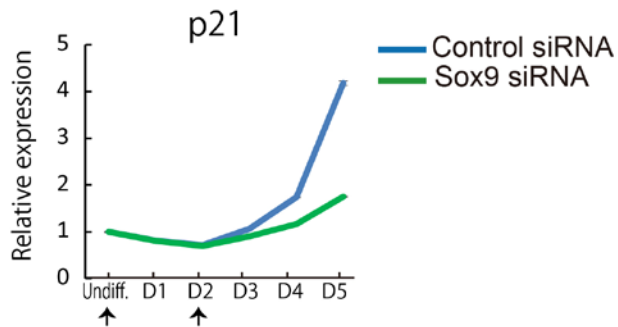

**Fig. S4. Blocking the activation of endogenous Sox9 with an siRNA against Sox9 inhibits the increase of p21 expression that normally occurs from D4.** qPCR analyses showing the expression changes of p21. Arrows show the timing (D0 and D2) of treatment of siRNA against Sox9 or control.

Fig. S5 Yamamizu K.

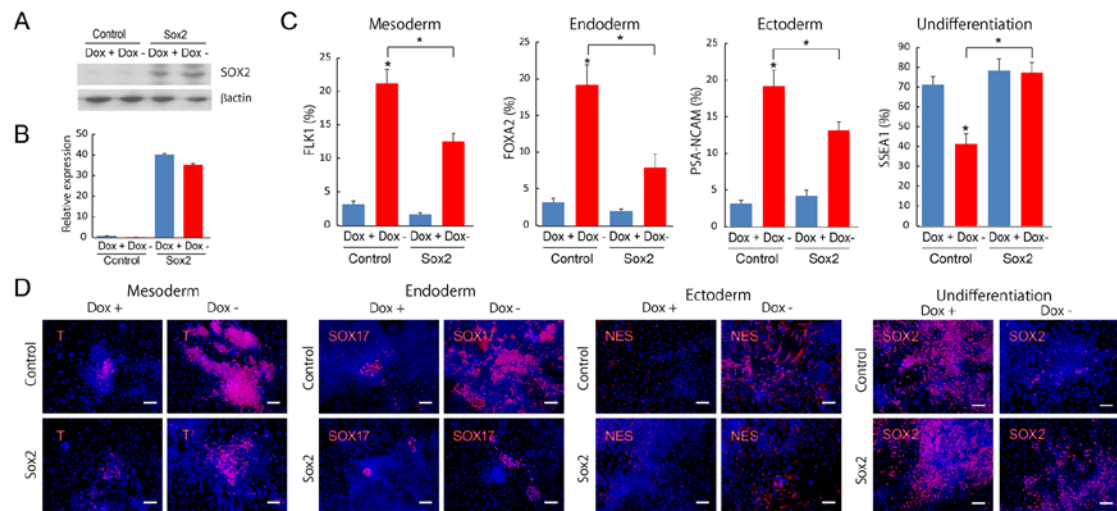

**Fig. S5. Overexpression of *Sox2* prevents ESCs from differentiating into three germ layers, even when the exogenous *Sox9* was overexpressed.** (A) Western blots detecting SOX2 and  $\beta$ -actin in Sox9-inducible ESCs cultured for 4 days in the Dox+ (control) or Dox- condition. (B) A qPCR analysis showing the mRNA expression of *Sox2* in Sox9-inducible ESCs cultured for 4 days in the Dox+ (control) or Dox- condition after transfecting with a Sox2-expressing vector or a control vector. (C) Summary of FACS analyses: Sox9-inducible ESCs cultured for 4 days (FLK1<sup>+</sup>, FOXA2<sup>+</sup> or SSEA1<sup>+</sup>) or 6 days (PSA-NCAM<sup>+</sup>) after transfecting with a Sox2-expressing vector or a control vector and stained for FLK1<sup>+</sup>, FOXA2<sup>+</sup>, SSEA1<sup>+</sup>, or PSA-NCAM<sup>+</sup>. (D) Microscopic images of Sox9-inducible ESCs cultured for 4 days after transfecting with a Sox2-expressing vector or a control vector and immunostained for T (mesoderm), SOX17 (endoderm), NES (ectoderm) and SOX2 (undifferentiation). Scale bar: 200  $\mu$ m.

Fig. S6 Yamamizu K.

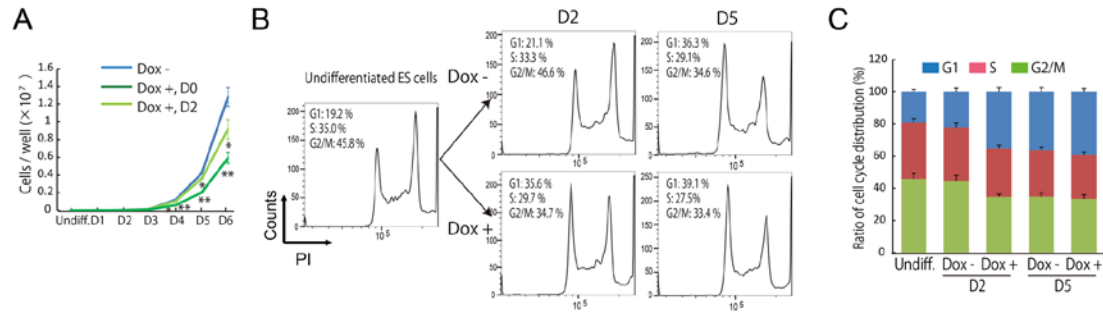

**Fig. S6. Cell cycle profile of Sox2-repressible ESCs by FACS analysis.** (A) Growth profiles of Sox2-repressible ESCs cultured in the Dox- (control), protocol 1 (Sox2-repressed from D0), or protocol 2 (Sox2-repressed from D2) (three independent experiments, SEM; \* $P < 0.05$ , \*\* $P < 0.01$  versus Dox+). (B,C) Cell cycle profiles of Sox2-repressible ESCs cultured for 2 days (D2) or 5 days (D5) in the Dox- (control) or Dox+ condition and analyzed by FACS (three independent experiments).

**Supplementary material Table S1: Primer list for qPCR (related to Figs 2, 4-6)**

Oct3/4 F GGA CAT GAA AGC CCT GCA GAA  
Oct3/4 R GAC AGA TGG TGG TCT GGC TGA A  
Nanog F GAA TTC TGG GAA CGC CTC ATC  
Nanog R CCT TGT CAG CCT CAG GAC TTG  
Sox2 F AAC CGA TGC ACC GCT ACG A  
Sox2 R TGC TGC GAG TAG GAC ATG CTG  
T F GAA CAG CTC TCC AAC CTA TG  
T R AGA CTG GGA TAC TGG CTA GAG  
Fik1 F GGG ATG GTC CTT GCA TCA GAA  
Fik1 R ACT GGT AGC CAC TGG TCT GGT TG  
PDGFRa F CTT TGT GCC TCT CGG GAT GA  
PDGFRa R AGG TTA CTT GAG TCT CCG GAT CTG  
Foxa2 F GTC GTC CGA GCA GCA ACA TC  
Foxa2 R GGG TAG TGC ATG ACC TGT TCG TAG  
Sox17 F GGA CAC GAC TGC GGA GTG AA  
Sox17 R GGT CGG CAA CCG TCA AAT G  
Gsc F CCC GGT TCT GTA CTG GTG TC  
Gsc R AGC TGC TCA TCG GTG AAG AT  
Nestin F GGG CCA GCA CTC TTA GCT TTG ATA  
Nestin R TGA GCC TTC AGG GTG ATC CAG  
Fgf5 F AGT GTG CAG CGT CCA CAG AGA  
Fgf5 R TCC TAG TGT ATG CTT GGT GGA CAG A  
Sox9 F CTG AAG GGC TAC GAC TGG AC  
Sox9 R TAC TGG TCT GCC AGC TTC CT  
p21 F TTG CAC TCT GGT GTC TGA GC  
p21 R TCT GCG CTT GGA GTG ATA GA  
p27 F AGT CAG CGC AAG TGG AAT TT  
p27 R AGT AGA ACT CGG GCA AGC TG  
p53 F AAC CGC CGA CCT ATC CTT AC  
p53 R CTT CTG TAC GGC GGT CTC TC  
Rb F AGA GAG AAC GCC ACG AAA AA  
Rb R GAT GGC TGA TCA CTT GCA GA  
GAPDH F TGT GTC CGT CGT GGA TCT GA  
GAPDH R TTG CTG TTG AAG TCG CAG GAG

**Supplementary material Table S2: Primer list for ChIP (related to Figs 6,7)**

Sox2-5' UTR F CCC ATT TAT TCC CTG ACA GC  
Sox2-5' UTR R TGT GAT TAG TTT TTG GAA AGG  
Sox2-SRR2 F ATT TAT TCA GTT CCC AGT CCA AGC  
Sox2-SRR2 R CCC TCT CCC CCC ACG C  
Nanog-promoter F CAA CTT ACT AAG GTA GCC CGA GTC TTA A  
Nanog-promoter R CCT CCA AAA GTG CGG CTT T
